# Supplementary material for: Association of Disease Progression With Health-Related Quality of Life Among Adults With Breast, Lung, Pancreatic, and Colorectal Cancer
Source: PubMed Central journal article supplement — JAMA Netw Open. 2020 Mar 10;3(3):e200643. doi: 10.1001/jamanetworkopen.2020.0643 (PMC7064873; doi:10.1001/jamanetworkopen.2020.0643), 2020-03-10
Supplement: jamanetwopen-3-e200643-s001.pdf [file jamanetwopen-3-e200643-s001.pdf]

## Supplementary Online Content

Marschner N, Zacharias S, Lordick F, et al. Association of disease progression with health-related quality of life among adults with breast, lung, pancreatic, and colorectal cancer. *JAMA Netw Open.* 2020;3(3):e200643. doi:10.1001/jamanetworkopen.2020.0643

**eTable 1.** Covariates Used in Mixed-Model Analyses

**eFigure.** Questionnaire Return Rate

**eTable 2.** Additional Patient and Tumor Characteristics

**eTable 3.** Subsequent Disease Progressions

This supplementary material has been provided by the authors to give readers additional information about their work.

eTable 1. Covariates Used in Mixed-Model Analyses

| #  | Covariate                                              | TMK            | TPK                            | TLK                 | TKK                 |
|----|--------------------------------------------------------|----------------|--------------------------------|---------------------|---------------------|
| 1  | Baseline questionnaire-score <sup>a</sup>              | x              | x                              | x                   | x                   |
| 2  | Status of progression                                  | x              | x                              | x                   | x                   |
| 3  | Time                                                   | x              | x                              | x                   | x                   |
| 4  | Baseline-score by time                                 | x              | x                              | x                   | x                   |
| 5  | Age <sup>a</sup>                                       | x              | x                              | x                   | x                   |
| 6  | BMI <sup>a</sup>                                       | x              | x                              | x                   | x                   |
| 7  | Sex (m vs. f) <sup>a</sup>                             | n/a            | x                              | x                   | x                   |
| 8  | ECOG Performance Status ( $\geq 1$ vs. 0) <sup>a</sup> | x              | x                              | x                   | x                   |
| 9  | Charlson Comorbidity Index ( $\geq 1$ vs. 0)           | x <sup>b</sup> | x <sup>b</sup>                 | x <sup>a</sup>      | x <sup>a</sup>      |
| 10 | Metastases (M1 vs. M0) <sup>b</sup>                    | x              | x                              | x                   | x                   |
| 11 | Treatment regimen (time dependent) <sup>c</sup>        | CT<br>HT       | FOL<br>GEM+Nab<br>GEM<br>other | CAR<br>CIS<br>other | FFI<br>FFO<br>other |
| 12 | HR-status (pos. vs. neg.) <sup>a</sup>                 | x              | n/a                            | n/a                 | n/a                 |
| 13 | HER2-status (pos. vs. neg.) <sup>a</sup>               | x              | n/a                            | n/a                 | n/a                 |
| 14 | EGFR-alteration (yes vs. no) <sup>a</sup>              | n/a            | n/a                            | x                   | n/a                 |
| 15 | Smoking status (smoker vs. never-smoker) <sup>a</sup>  | n/a            | n/a                            | x                   | n/a                 |
| 16 | (K)RAS-status (wildtype vs. mutation) <sup>a</sup>     | n/a            | n/a                            | n/a                 | x                   |
| 17 | Location of primary tumor (right vs. left)             | n/a            | n/a                            | n/a                 | x                   |

<sup>a</sup> at enrollment (start of treatment)

<sup>b</sup> at diagnosis

<sup>c</sup> this covariate considers different treatment regimen over time (e.g. per line of treatment)

**Abbreviations:** BMI, body mass index | CAR+X, carboplatin | CIS+X, cisplatin | CT, chemotherapy | ECOG, European Cooperative Oncology Group | EGFR, epidermal growth factor receptor | FFI, FOLFIRI+X | FFO, FOLFOX+X | FOL, FOLFIRINOX | GEM+Nab, gemcitabine + nab-paclitaxel | GEM, gemcitabine | HER2, human epidermal growth factor receptor 2 | HR, hormone receptor | HT, endocrine therapy | (K)RAS, Kirsten rat sarcoma viral oncogene.

## eFigure. Questionnaire Return Rate

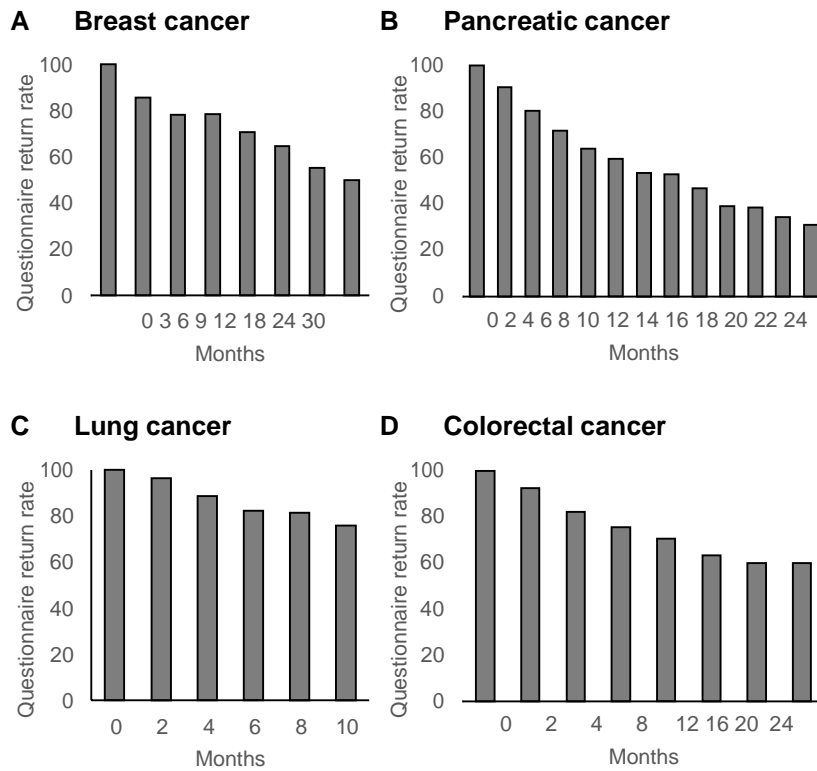

Questionnaire return rate of patients alive, who had received the respective questionnaire. First time point (0) corresponds to the first questionnaire at start of treatment. **(A)** Patients with breast cancer **(B)** Patients with pancreatic cancer **(C)** Patients with lung cancer **(D)** Patients with colorectal cancer.

**eTable 2. Additional Patient and Tumor Characteristics**

| <b>Characteristic, n (%)</b> | <b>Breast Cancer<br/>(n=464)</b> | <b>Lung Cancer<br/>(n=341)</b> | <b>Colorectal Cancer<br/>(n=702)</b> |
|------------------------------|----------------------------------|--------------------------------|--------------------------------------|
| Hormone receptor status      |                                  |                                |                                      |
| HR-positive                  | 354 (76.3%)                      |                                |                                      |
| HR-negative                  | 104 (22.4%)                      |                                |                                      |
| Unknown                      | 6 (1.3%)                         |                                |                                      |
| HER2-receptor status         |                                  |                                |                                      |
| HER2-positive                | 116 (25.0%)                      |                                |                                      |
| HER2-negative                | 327 (70.5%)                      |                                |                                      |
| Unknown                      | 21 (4.5%)                        |                                |                                      |
| Smoking status               |                                  |                                |                                      |
| Smoker (current or former)   |                                  | 274 (80.4%)                    |                                      |
| Never smoker                 |                                  | 37 (10.9%)                     |                                      |
| Unknown                      |                                  | 30 (8.8%)                      |                                      |
| <i>EGFR</i> -mutation        |                                  |                                |                                      |
| Yes                          |                                  | 25 (7.3%)                      |                                      |
| No                           |                                  | 140 (41.1%)                    |                                      |
| Unknown                      |                                  | 176 (51.6%)                    |                                      |
| <i>(K)RAS</i> -status        |                                  |                                |                                      |
| <i>(K)RAS</i> mutation       |                                  |                                | 369 (52.6%)                          |
| <i>(K)RAS</i> wildtype       |                                  |                                | 333 (47.4%)                          |
| Primary tumor location       |                                  |                                |                                      |
| Left                         |                                  |                                | 496 (70.7%)                          |
| Right                        |                                  |                                | 206 (29.3%)                          |

**eTable 3. Subsequent Disease Progressions**

| <b>Breast cancer (FACT-G &amp; HADS)</b> |                                     |                   |                                     |                   |                                     |                     |
|------------------------------------------|-------------------------------------|-------------------|-------------------------------------|-------------------|-------------------------------------|---------------------|
| Scale                                    | 2 <sup>nd</sup> Disease Progression |                   | 3 <sup>rd</sup> Disease Progression |                   | 4 <sup>th</sup> Disease Progression |                     |
|                                          | n                                   | Estimate (95% CI) | n                                   | Estimate (95% CI) | n                                   | Estimate (95% CI)   |
| PWB                                      | 94                                  | 1.94 (-1.8-5.7)   | 16                                  | 7.58 (0.4-14.8)   | 6                                   | -8.89 (-21.0-3.2)   |
| FWB                                      | 95                                  | 3.98 (0.6-7.3)    | 16                                  | 0.82 (-5.7-7.3)   | 7                                   | -4.05 (-14.7-6.5)   |
| Depression                               | 87                                  | 3.10 (0.0-6.2)    | 15                                  | -0.76 (-6.8-5.3)  | 7                                   | 0.52 (-9.1-10.1)    |
| Global QoL                               | 92                                  | 1.22 (-1.2-3.7)   | 16                                  | 3.59 (-1.1-8.3)   | 6                                   | -5.21 (-13.0-2.6)   |
| EWB                                      | 95                                  | 2.97 (-0.3-6.3)   | 16                                  | 7.82 (1.4-14.2)   | 7                                   | -7.40 (-17.7-2.9)   |
| Anxiety                                  | 87                                  | 1.92 (-1.1-5.0)   | 15                                  | 4.38 (-1.6-10.3)  | 7                                   | -15.84 (-25.1--6.6) |
| SWB                                      | 94                                  | -1.89 (-5.1-1.3)  | 16                                  | -2.39 (-8.5-3.8)  | 6                                   | -1.07 (-11.3-9.2)   |

  

| <b>Pancreatic cancer (EORTC QLQ-C15)</b> |                                     |                   |                                     |                   |                                     |                     |
|------------------------------------------|-------------------------------------|-------------------|-------------------------------------|-------------------|-------------------------------------|---------------------|
| Scale                                    | 2 <sup>nd</sup> Disease Progression |                   | 3 <sup>rd</sup> Disease Progression |                   | 4 <sup>th</sup> Disease Progression |                     |
|                                          | n                                   | Estimate (95% CI) | n                                   | Estimate (95% CI) | n                                   | Estimate (95% CI)   |
| Appetite loss                            | 144                                 | 7.88 (1.6-14.1)   | 22                                  | 20.27 (6.7-33.8)  | 1                                   | 42.91 (-14.6-100.0) |
| Pain                                     | 147                                 | 10.10 (5.0-15.2)  | 22                                  | 11.64 (0.5-22.8)  | 1                                   | 16.96 (-29.6-63.5)  |
| PF                                       | 139                                 | 10.65 (6.4-14.9)  | 20                                  | 14.51 (5.0-24.0)  | 1                                   | 57.78 (20.7-94.9)   |
| Fatigue                                  | 140                                 | 9.08 (4.6-13.6)   | 19                                  | 15.93 (5.6-26.3)  | 1                                   | 8.88 (-30.8-48.5)   |
| Global QoL                               | 145                                 | 10.77 (7.0-14.6)  | 22                                  | 11.90 (3.7-20.2)  |                                     |                     |
| Constipation                             | 144                                 | 6.59 (1.0-12.2)   | 22                                  | 9.36 (-2.7-21.4)  | 1                                   | 1.61 (-49.0-52.2)   |
| Insomnia                                 | 142                                 | 2.65 (-2.7-8.0)   | 22                                  | 16.28 (4.7-27.9)  |                                     |                     |
| Nausea                                   | 146                                 | 7.28 (2.3-12.2)   | 22                                  | -2.84 (-13.7-8.0) | 1                                   | 2.48 (-43.2-48.1)   |
| EF                                       | 143                                 | 9.53 (5.0-14.1)   | 22                                  | 6.58 (-3.2-16.3)  | 1                                   | 12.19 (-29.1-53.5)  |
| Dyspnoea                                 | 145                                 | 4.72 (-0.3-9.7)   | 21                                  | 7.45 (-3.7-18.6)  | 1                                   | 77.02 (31.1-100.0)  |

  

| <b>Lung Cancer (EORTC QLQ-C30)</b> |                                     |                   |                                     |                     |                                     |                     |
|------------------------------------|-------------------------------------|-------------------|-------------------------------------|---------------------|-------------------------------------|---------------------|
| Scale                              | 2 <sup>nd</sup> Disease Progression |                   | 3 <sup>rd</sup> Disease Progression |                     | 4 <sup>th</sup> Disease Progression |                     |
|                                    | n                                   | Estimate (95% CI) | n                                   | Estimate (95% CI)   | n                                   | Estimate (95% CI)   |
| Appetite loss                      | 59                                  | 16.24 (6.7-25.8)  | 8                                   | -11.14 (-33.4-11.1) | 1                                   | -23.32 (-84.3-37.7) |
| PF                                 | 59                                  | 10.61 (5.2-16.0)  | 8                                   | -0.68 (-12.8-11.4)  | 1                                   | -4.23 (-36.8-28.4)  |
| Fatigue                            | 59                                  | 8.42 (2.3-14.5)   | 8                                   | 9.01 (-4.7-22.8)    | 1                                   | -43.06 (-80.5--5.6) |
| SF                                 | 60                                  | 10.95 (3.8-18.1)  | 8                                   | 5.99 (-10.6-22.6)   | 1                                   | -9.96 (-54.6-34.7)  |
| Pain                               | 60                                  | 8.68 (0.7-16.6)   | 8                                   | 8.64 (-9.7-26.9)    | 1                                   | -41.75 (-91.8-8.3)  |
| Global QoL                         | 57                                  | 11.58 (5.9-17.3)  | 7                                   | 1.47 (-12.2-15.1)   | 1                                   | 1.17 (-34.0-36.3)   |
| EF                                 | 60                                  | 9.63 (3.9-15.4)   | 8                                   | -2.53 (15.8-10.8)   |                                     |                     |
| CF                                 | 60                                  | 11.70 (5.7-17.7)  | 8                                   | 8.59 (-5.2-22.4)    | 1                                   | -31.83 (-68.9-5.2)  |
| RF                                 | 58                                  | 13.60 (6.4-20.8)  | 8                                   | 7.83 (-8.4-24.1)    | 1                                   | 0.92 (-43.2-45.0)   |
| Nausea                             | 60                                  | 2.22 (-4.1-8.5)   | 8                                   | 9.33 (-5.3-23.9)    | 1                                   | -18.05 (-58.6-22.5) |
| Dyspnoea                           | 55                                  | 6.84 (-0.9-14.6)  | 7                                   | 6.45 (-11.9-24.8)   |                                     |                     |
| Insomnia                           | 59                                  | 13.86 (5.6-22.1)  | 8                                   | -12.90 (-32.0-6.2)  |                                     |                     |
| Constipation                       | 58                                  | 11.00 (1.9-20.1)  | 8                                   | 2.43 (-18.9-23.8)   | 1                                   | -11.81 (-69.7-46.1) |
| Diarrhoea                          | 56                                  | 1.88 (-4.9-8.7)   | 8                                   | -13.95 (-30.0-2.1)  | 1                                   | 3.03 (-41.6-47.6)   |

  

| <b>Colorectal Cancer (EORTC QLQ-C30)</b> |                                     |                   |                                     |                   |                                     |                     |
|------------------------------------------|-------------------------------------|-------------------|-------------------------------------|-------------------|-------------------------------------|---------------------|
| Scale                                    | 2 <sup>nd</sup> Disease Progression |                   | 3 <sup>rd</sup> Disease Progression |                   | 4 <sup>th</sup> Disease Progression |                     |
|                                          | n                                   | Estimate (95% CI) | n                                   | Estimate (95% CI) | n                                   | Estimate (95% CI)   |
| Appetite loss                            | 148                                 | 12.29 (6.6-18.0)  | 32                                  | 9.60 (-1.5-20.7)  | 5                                   | -3.83 (-28.3-20.6)  |
| PF                                       | 151                                 | 9.92 (6.6-13.3)   | 32                                  | 5.84 (-0.8-12.4)  | 5                                   | -21.13 (-35.5--6.8) |
| Nausea                                   | 151                                 | 2.77 (-1.0-6.6)   | 32                                  | 7.37 (-0.2-14.9)  | 5                                   | -14.91 (-31.8-2.0)  |
| Fatigue                                  | 151                                 | 7.96 (3.9-12.0)   | 32                                  | 7.84 (-0.1-15.8)  | 5                                   | -1.79 (-19.2-15.6)  |
| Constipation                             | 148                                 | 5.44 (0.4-10.5)   | 31                                  | -2.55 (-12.6-7.5) | 5                                   | 14.92 (-7.1-36.9)   |
| Dyspnoea                                 | 149                                 | 8.58 (3.4-13.7)   | 32                                  | -3.82 (-13.8-6.2) | 5                                   | -12.78 (-34.3-8.8)  |
| Pain                                     | 152                                 | 10.25 (5.3-15.2)  | 34                                  | -0.12 (-9.5-9.3)  | 5                                   | -12.28 (-33.8-9.2)  |
| Global QoL                               | 150                                 | 7.54 (3.9-11.2)   | 34                                  | 3.85 (-3.1-10.8)  | 5                                   | -9.35 (-25.3-6.6)   |
| SF                                       | 151                                 | 9.20 (4.7-13.7)   | 34                                  | 6.39 (-2.3-15.0)  | 5                                   | -22.44 (-42.0--2.9) |
| RF                                       | 147                                 | 11.02 (6.2-15.9)  | 32                                  | 2.35 (-7.0-11.7)  | 5                                   | -13.55 (-34.3-7.2)  |
| EF                                       | 151                                 | 6.16 (2.6-9.7)    | 34                                  | 3.31 (-3.5-10.1)  | 5                                   | 0.94 (-14.6-16.4)   |
| CF                                       | 151                                 | 5.18 (1.6-8.7)    | 34                                  | -3.03 (-9.8-3.7)  | 5                                   | -5.46 (-20.5-9.6)   |
| Diarrhoea                                | 151                                 | 3.02 (-3.0-9.0)   | 32                                  | 7.82 (-3.9-19.5)  | 5                                   | -2.23 (-28.2-23.7)  |
| Insomnia                                 | 150                                 | 7.58 (2.3-12.8)   | 31                                  | 2.03 (-8.5-12.5)  | 5                                   | -3.72 (-26.5-19.1)  |

n = number of questionnaires filled in by patients after the respective progression and before a subsequent disease progression.  
**Abbreviations:** CF, cognitive functioning; CI, confidence interval; EF, emotional functioning; EWB, emotional well-being; FWB, functional well-being; PF, physical functioning; PWB, physical well-being; QoL, quality of life; RF, role functioning; SF, social functioning; SWB, social well-being.
